# Supplementary material for: A colorimetric biosensor for ultrasensitive detection of the SURF1 gene based on a dual DNA-induced cascade hybridization reaction
Source: Royal Society of Chemistry journal article supplement (doi:10.1039/d1ay01102b), 2021-01-01
Supplement: d1ay01102b1.pdf [file d1ay01102b1.pdf]

## **A colorimetric biosensor for ultrasensitive detection of *SURF1* gene based on dual DNA-induced cascade hybridization reaction**

Tianxiao Yu<sup>1a</sup>, Yafang Wang<sup>1b</sup>, Huili Quan<sup>a</sup>, Yucui Meng<sup>a</sup>, Zhaohua Wang<sup>b</sup>,  
Chunchao Zhao<sup>a</sup>, Qing Guo<sup>a\*</sup>, Jun Ge<sup>a\*</sup>

*a. Research center for clinical medical sciences, the fourth hospital of Shijiazhuang (The affiliated obstetrics and gynecology hospital of Hebei medical university), Shijiazhuang, 050000, China*

*b. Department of clinical laboratory, the fourth hospital of Shijiazhuang (The affiliated obstetrics and gynecology hospital of Hebei medical university), Shijiazhuang, 050000, China*

---

\*Corresponding author: email: [Gingguo123@126.com](mailto:Gingguo123@126.com) (Qing Guo) and [404828162@qq.com](mailto:404828162@qq.com) (Jun Ge)

1 These authors contributed equally to this work.

Table S1. The DNA sequences employed in the present work.

| <b>NAME</b>   | <b>SEQUENCE (5'-3')</b>                         |
|---------------|-------------------------------------------------|
| <b>TARGET</b> | <b>GCCCGCGGGGCCGGGTGCGATGGCGGCGGTGGCTGCGTTG</b> |
| <b>CP</b>     | <b>BIOTIN-TTTTTTGTACGCACGTTAGATCGCACCCGG</b>    |
| <b>CP-1</b>   | <b>SH-TTTTTTGTACGCACGTTAGATCGCACCCGG</b>        |
| <b>S1</b>     | <b>ACCGCCGCCATCTAACGTGC</b>                     |
| <b>P1</b>     | <b>CCCCGCGGGCCGATTAGCGTTAGA AGGCGC-DIGOXIN</b>  |
| <b>P2</b>     | <b>ACGCTA ATCGGCGCCTTCTA-DIGOXIN</b>            |

---

**P3 ATGACTGACGATTGCATCGCCAACGCAGCC-DIGOXIN**

**P4 CGTCAGTCATGCGATGCAAT-DIGOXIN**

**SM**

**GCCCGCGGGGCCGGCTGCGATGGCGGCGGTGGCTGCGTTG**

**DM**

**GCCCGCGGGGCCGGCTGCGATGGCGGCGGTGGCTGCGTTG**

**NM**

**CAAGTACCCATCTTTACGATACCTCCAAACTTGATGTAGT**

---

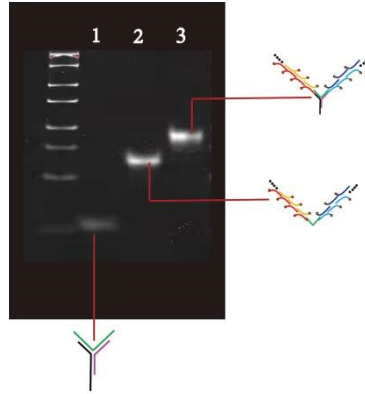

**Figure S1.** The Gel electrophoresis analyses ( $1.0 \times 10^{-6} \text{M}$ ): (1) “Y” structure (capture probe, target SURF1 gene fragment, auxiliary probe S1), (2) dual DNA-induced cascade hybridization reaction ( target SURF1 gene fragment, P1-P4 probes ), (3) “Y” structure and dual DNA-induced cascade hybridization reaction (capture probe, target SURF1 gene fragment, auxiliary probe S1 and P1-P4 probes)

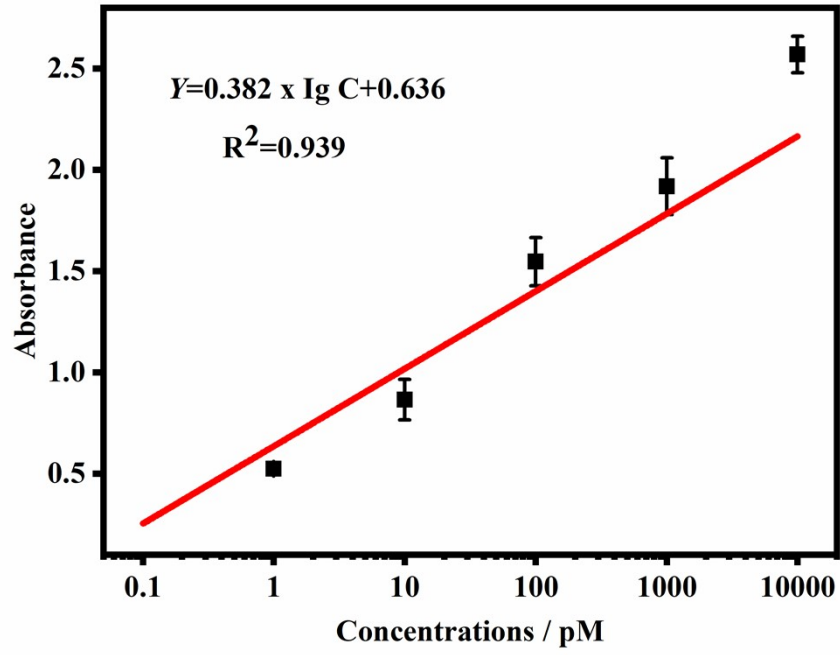

Figure S2. Linear correlation between the absorbance response and the logarithm of *SURF1* gene fragment concentration in the range of 1 pM-10 nM without DNA-induced cascade hybridization reaction.
